# Supplementary material
Source: PubMed Central journal article supplement (PMC9533670)
Supplement: mmc1.pdf [file mmc1.pdf]

**Cell Reports, Volume 41**

**Supplemental information**

**ZBTB7A promotes virus-host homeostasis during  
human coronavirus 229E infection**

**Xinyu Zhu, Joseph D. Trimarco, Courtney A. Williams, Alejandro Barrera, Timothy E. Reddy, and Nicholas S. Heaton**

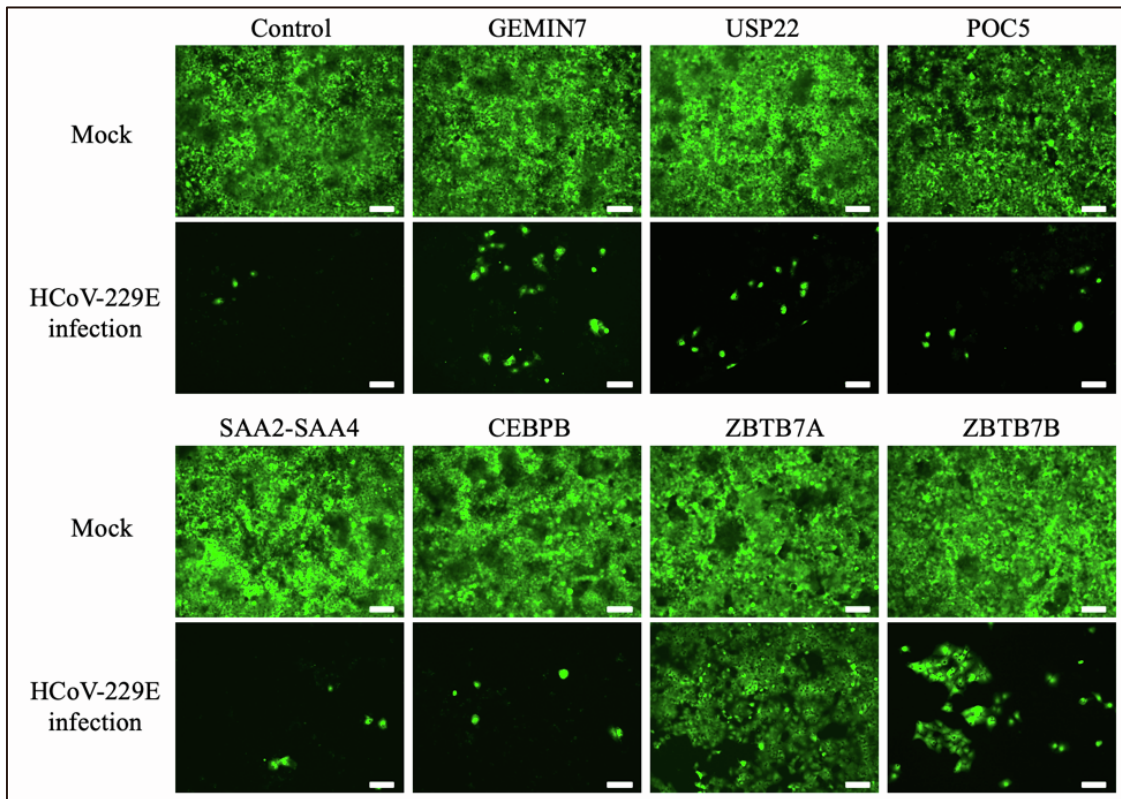

**Fig. S1. Survival of Huh7 cells expressing seven candidate genes after HCoV-229E infection, related to Figure 1.** Transduced cells were infected with HCoV-229E at 0.5 MOI. Live cells (green) were stained 5 DPI. Images are representative of two independent experiments. Scale bar=100  $\mu$ m.

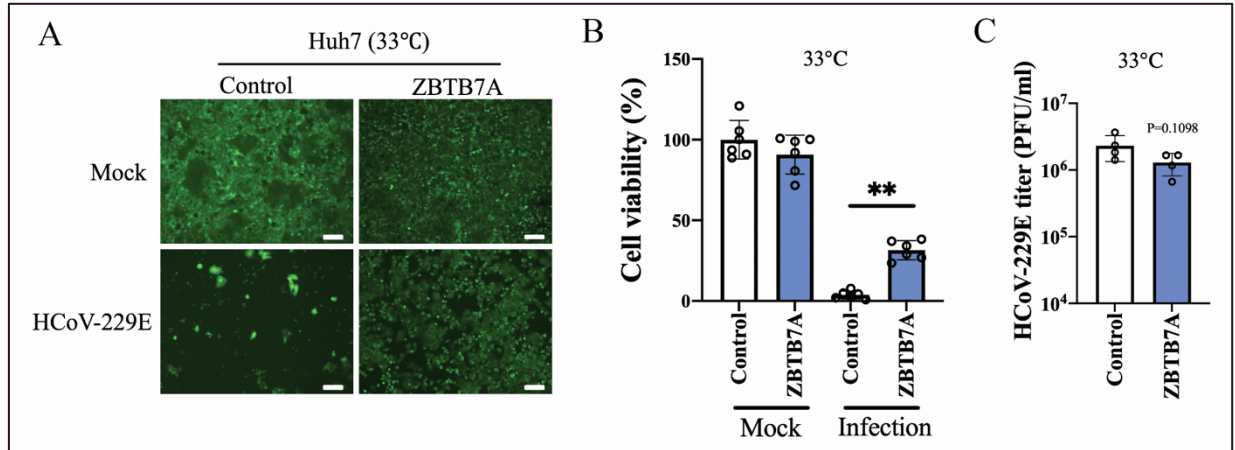

**Fig. S2. ZBTB7A promotes cell survival during HCoV-229E infection at 33°C, related to Figure 2.** (A) Transduced cells were infected with HCoV-229E at 0.5 MOI. Live cells (green) were stained 3 DPI. Scale bar=100  $\mu$ m. (B) Cell viability of transduced Huh7 cells after infection. Transduced cells were infected as described in panel A. MTT assay was conducted 3 DPI. N=6 biological replicates. (C) Viral titer tested by plaque assay. The infection was conducted as described in panel A. Samples were collected at 2 DPI. N=4 biological replicates. *P* values were calculated by unpaired two-tailed Student's *t*-tests. For panel B,  $P < 0.001$ , \*\*. All panels are representative of two independent experiments.

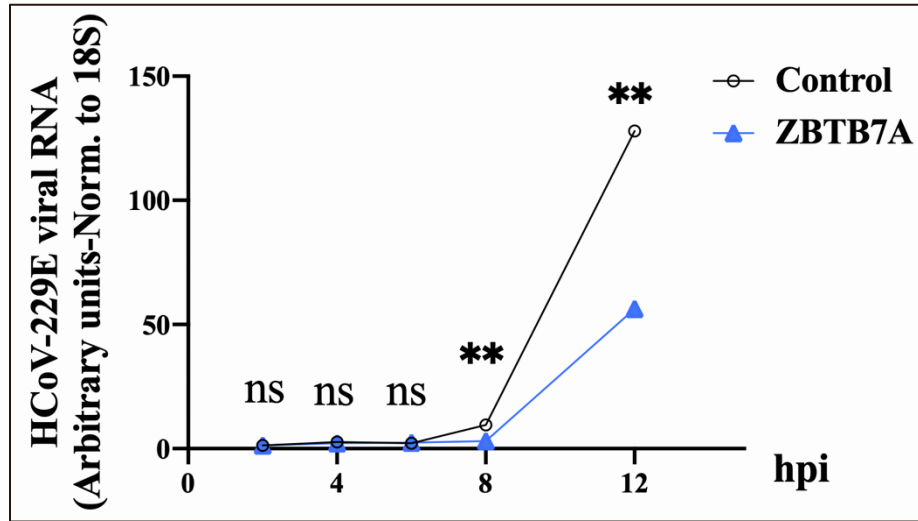

**Fig. S3. ZBTB7A slightly affects HCoV-229E early infection, related to Figure 2.** Huh7 cells were infected with HCoV-229E at 0.5 MOI. Samples were collected at indicated timepoint. N=4 biological replicates. *P* values were calculated by two-way analysis of variance (ANOVA). *P*<0.05, \*; *P*<0.001, \*\*; not significant, ns. Representative of two independent experiments.

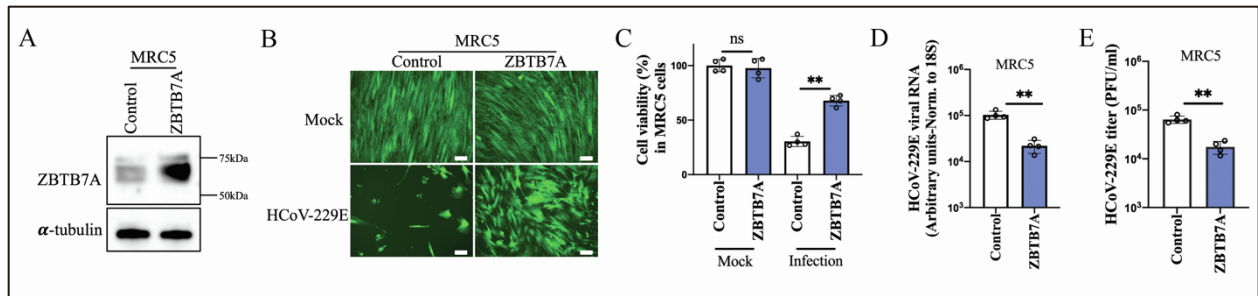

**Fig. S4. ZBTB7A promotes survival of MRC5 cells after HCoV-229E infection, related to Figure 2.** (A) ZBTB7A expression in transduced MRC5 cells. (B) MRC5 cells expressing ZBTB7A were infected with HCoV-229E at 1 MOI. Live cells were stained 5 DPI. Scale bar=100  $\mu$ m. (C) Control-MRC5 cells and ZBTB7A-MRC5 cells were infected as described in panel B. MTT assays were conducted 5 DPI. N=4 biological replicates. (D) Viral RNA detected through qRT-PCR. The infection was conducted as described in panel B. Viral RNA was analyzed at 2 DPI. N=4 biological replicates. (E) Viral titer tested by plaque assay. The infection was conducted as described in panel B. N=4 biological replicates. All panels are representative of two independent experiments. *P* values were calculated by unpaired two-tailed Student's *t*-tests. For all panels, *P*<0.05, \*; *P*<0.001, \*\*; not significant, ns.

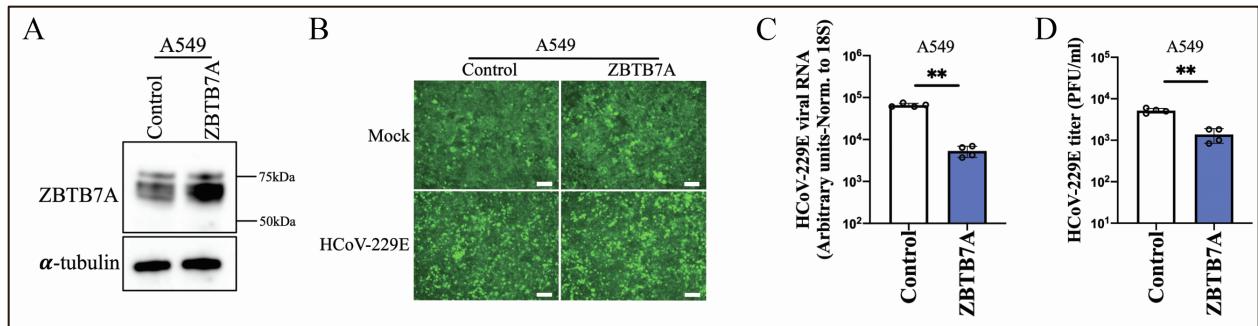

**Fig. S5. ZBTB7A expression slightly inhibits HCoV-229E infection in A549 cells, related to Figure 2.** (A) ZBTB7A expression in transduced A549 cells. (B) Control-A549 cells and ZBTB7A-A549 cells were infected with HCoV-229E at 0.5 MOI. Live cells were stained 5 DPI. Scale bar=100  $\mu$ m. (C) Viral RNA detected through qRT-PCR at 2 DPI. Infection was conducted as described in panel B. N=4 biological replicates.  $P < 0.001$ , \*\*. (D) Viral titer was tested by plaque assay. Infection was conducted as described in panel B. N=4 biological replicates.  $P$  values were calculated by unpaired two-tailed Student's  $t$ -tests.  $P < 0.001$ , \*\*. All panels are representative of two independent experiments.

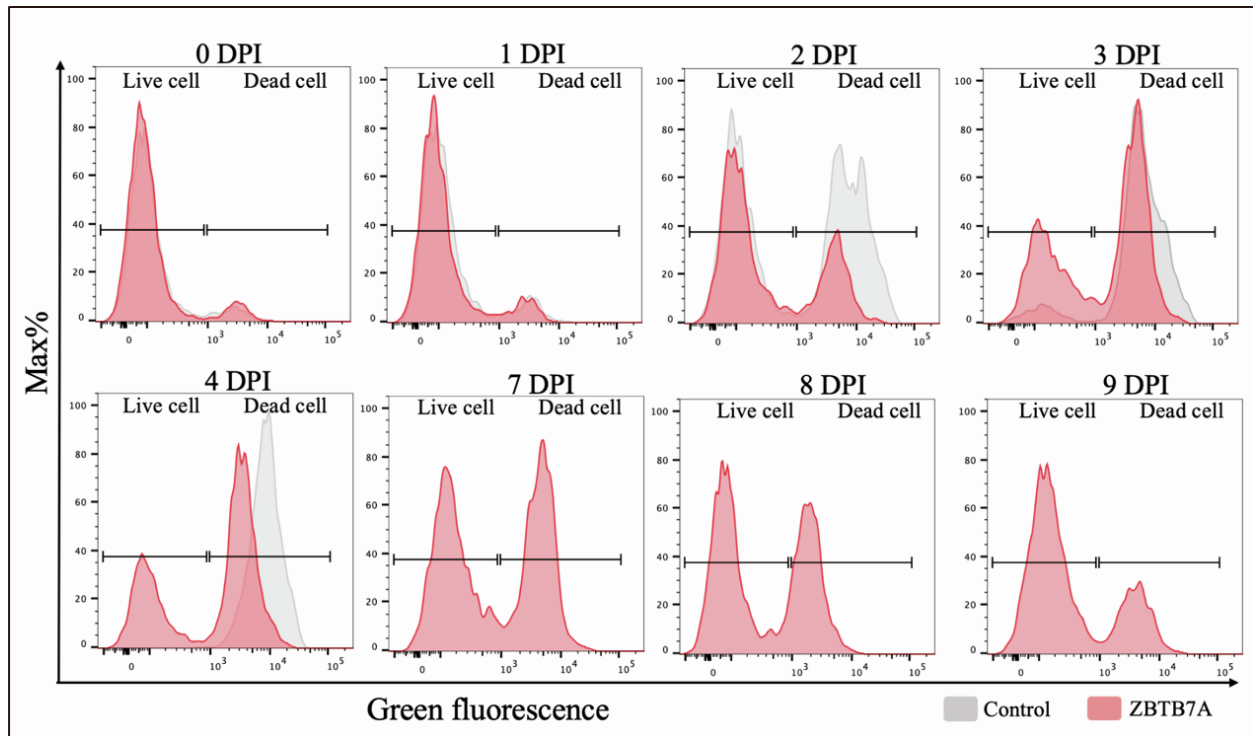

**Fig. S6. Live and dead cells assay during HCoV-229E infection, related to Figure 2.** Control-Huh7 cells and ZBTB7A-Huh7 cells were infected at 1 MOI. Live and dead cells were stained and analyzed by flow cytometry at the indicated time points. Representative of two independent experiments.

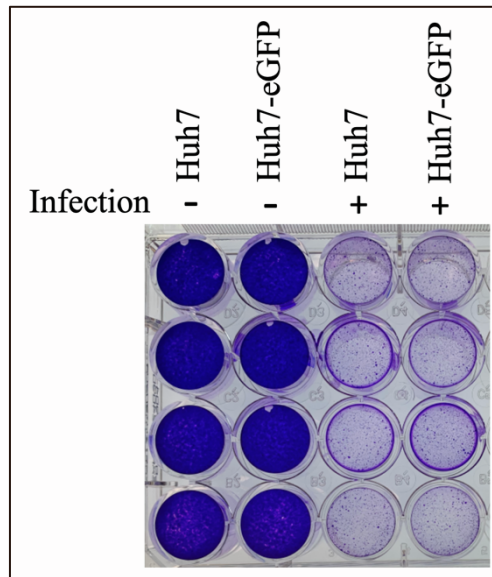

**Fig. S7. Crystal violet staining of eGFP transduced Huh7 cells after infection, related to Figure 2.** Huh7 cells expressing eGFP were infected with HCoV-229E at 0.5 MOI. The cells were stained 3 DPI. Representative of two independent experiments.



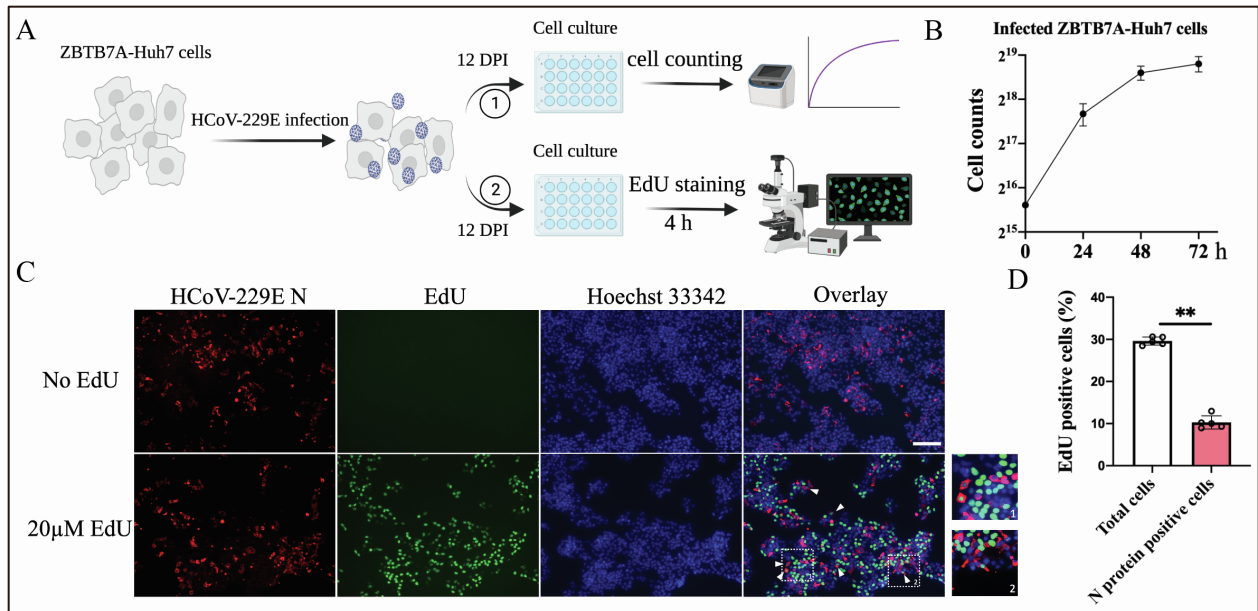

**Fig. S8. The proliferation of infected ZBTB7A-Huh7 cells, related to Figure 2.** (A) Overview of proliferation analysis for infected ZBTB7A-Huh7 cells. ZBTB7A-Huh7 cells were infected with HCoV-229E at 0.5 MOI. The persistently infected ZBTB7A-Huh7 cells at 12 DPI were seeded in 24-well plate. Cell counts were calculated by automated cell counter to present cell proliferation curve in the time course. In addition, the infected ZBTB7A-Huh7 cells were incubated with EdU for 4 h and further analyzed by fluorescence microscopy. (B) The infected ZBTB7A-Huh7 cells (12 DPI) were cultured and stained with trypan blue solution at indicated timepoint. Cell counts were calculated by automated cell counter. (C) The infected ZBTB7A-Huh7 cells (12 DPI) were treated with 20 $\mu$ M EdU for 4 h. HCoV-229E N and EdU were stained. Images representative of N=5 biological replicates. Scale bars=100  $\mu$ m. (D) EdU positive cells were calculated from the experiment shown in panel C via Image J. N=5 biological replicates. *P* values were calculated by unpaired two-tailed Student's *t*-tests. *P*<0.001, \*\*. All panels are representative of two independent experiments.

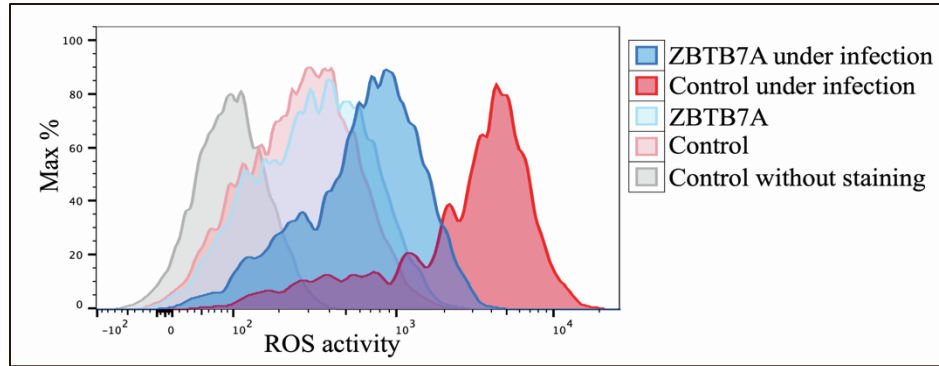

**Fig. S9. ROS activity in Huh7 cells during infection, related to Figure 4.** ZBTB7A-Huh7 cells and control-Huh7 cells were infected with HCoV-229E at 0.5 MOI. Samples were stained at 2 DPI and analyzed by flow cytometry. Representative of two independent experiments.

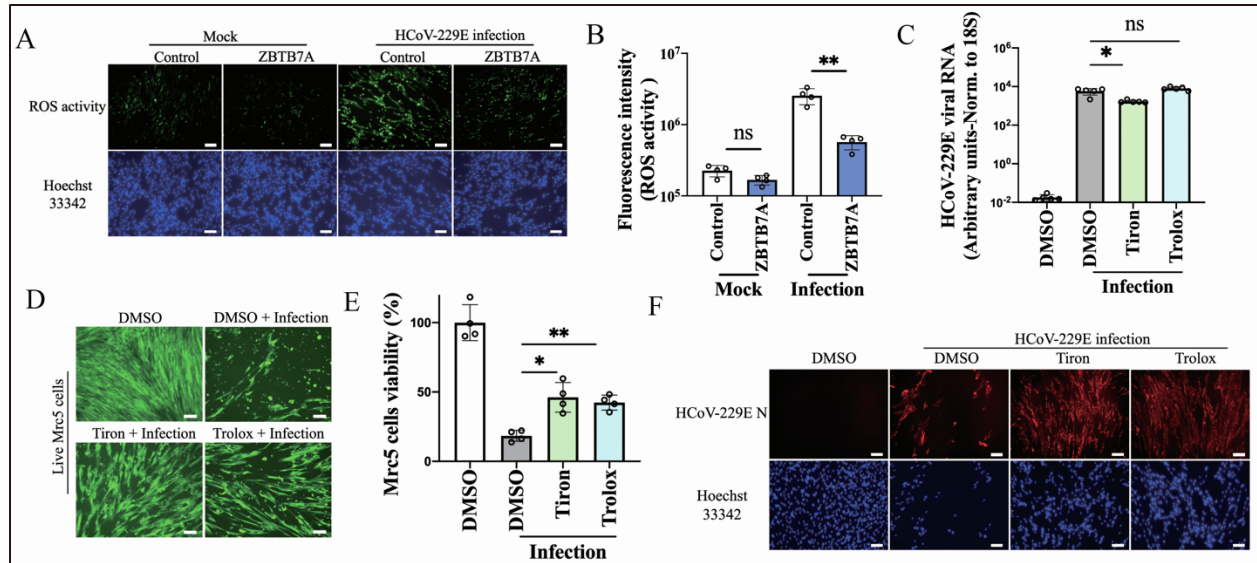

**Fig. S10. ZBTB7A controls HCoV-229E-induced ROS activation in MRC5 cells, related to Figure 4.** (A) ZBTB7A-MRC5 cells and control-MRC5 cells were infected with HCoV-229E at 0.5 MOI. ROS activity (green) was stained and imaged 2 DPI. (B) Fluorescence intensity of ROS activity in MRC5 cells calculated from panel A by Image J. N=4 biological replicates. (C) Viral RNA detection after superoxide scavenger treatment. MRC5 cells were infected with HCoV-229E at 0.5 MOI and treated with 10 mM tiron or 200  $\mu$ M trolox were added at 2 hpi. Cells were collected at 2 DPI for qRT-PCR. N=5 biological replicates. (D) Surviving MRC5 cells imaging under tiron or trolox treatment. MRC5 cells were infected and treated as described in panel C. Surviving cells were stained 5 DPI. (E) MRC5 cells were treated as described in panel C and cell viability was determined by MTT assay and normalized to un-infected group. Value was N=4 biological replicates. (F) MRC5 cells were treated as described in panel C and HCoV-229E N was stained 5 DPI. All panels are representative of two independent experiments. For all panels,  $P < 0.05$ , \*;  $P < 0.001$ , \*\*; not significant, ns. Scale bar=100  $\mu$ m.
